# Supplementary material for: De novo transcriptome analysis provides insights into the salt tolerance of Podocarpus macrophyllus under salinity stress
Source: PubMed Central journal article supplement (PMC8543971; doi:10.1186/s12870-021-03274-1), 2021-10-25
Supplement: 12870_2021_3274_MOESM1_ESM.pdf [file 12870_2021_3274_MOESM1_ESM.pdf]

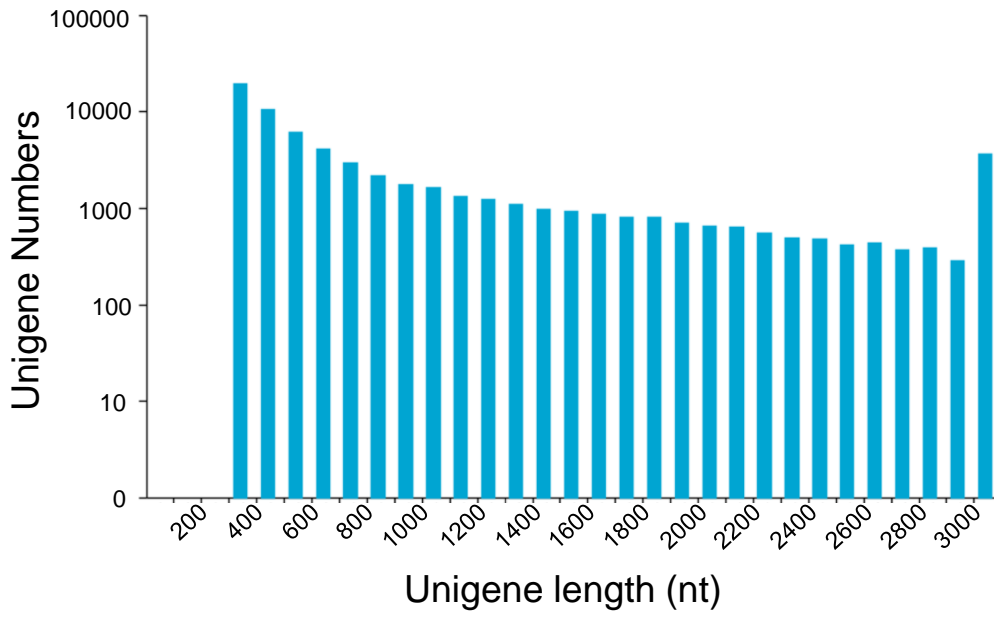

**Supplementary Figure 1.** Distribution of the different lengths of unigenes in the *de novo* assembled transcriptome of *P. macrophyllus*.

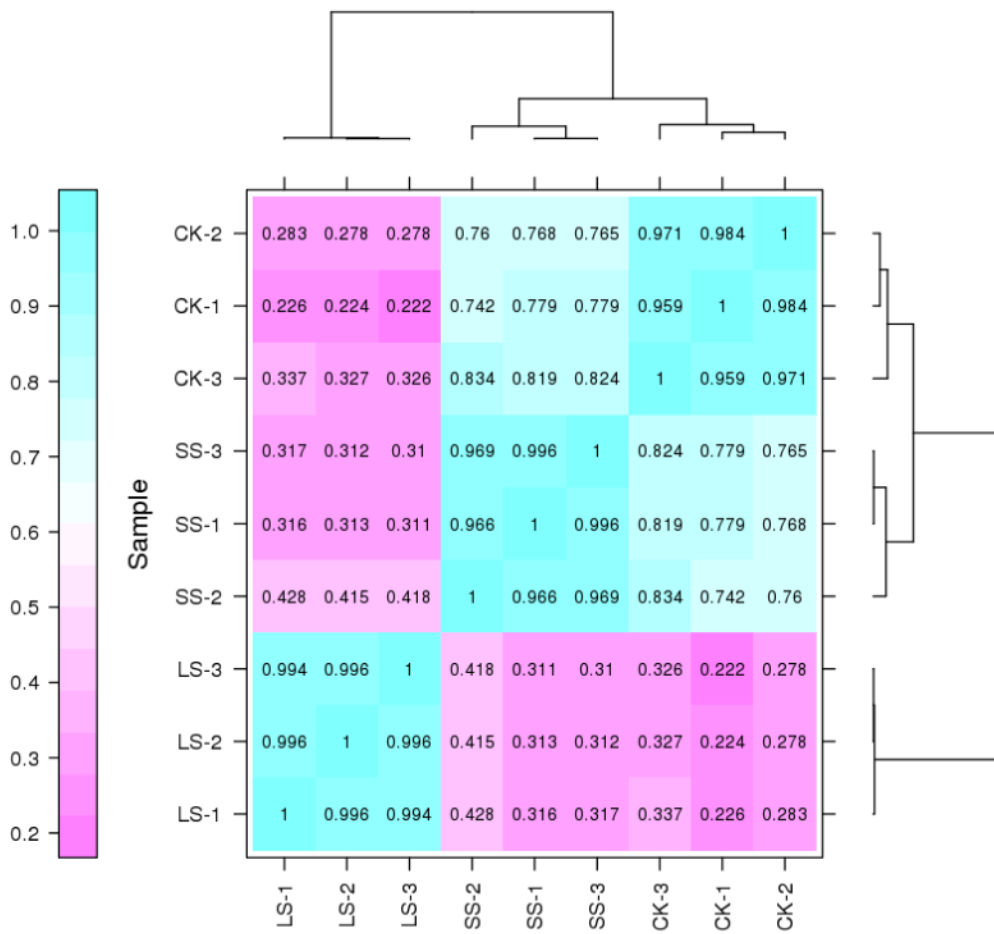

**Supplementary Figure 2.** Heatmap and Pearson correlation coefficients for RNA-seq replicates of *P. macrophyllus* under SS and LS salt stress and control. Three biological replicates are shown.

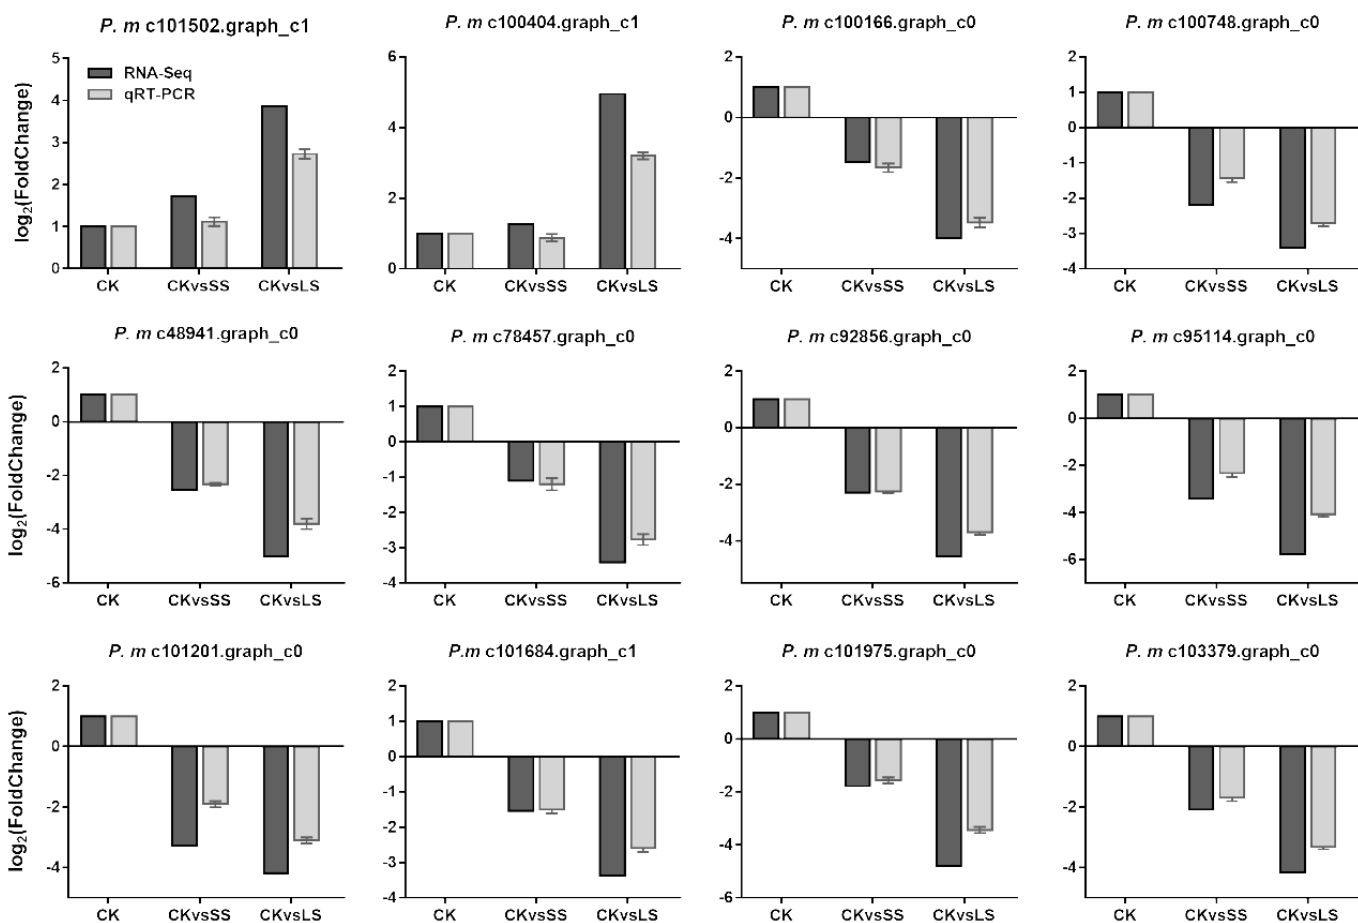

**Supplementary Figure 3.** Analysis of the fold changes of the 12 candidate DEGs in *P. macrophyllus* determined by RNA-seq and qRT-PCR. The x-axis represents the comparisons between salt stress and CK, the y-axis represents the log<sub>2</sub>(fold change).

## Transcription factors

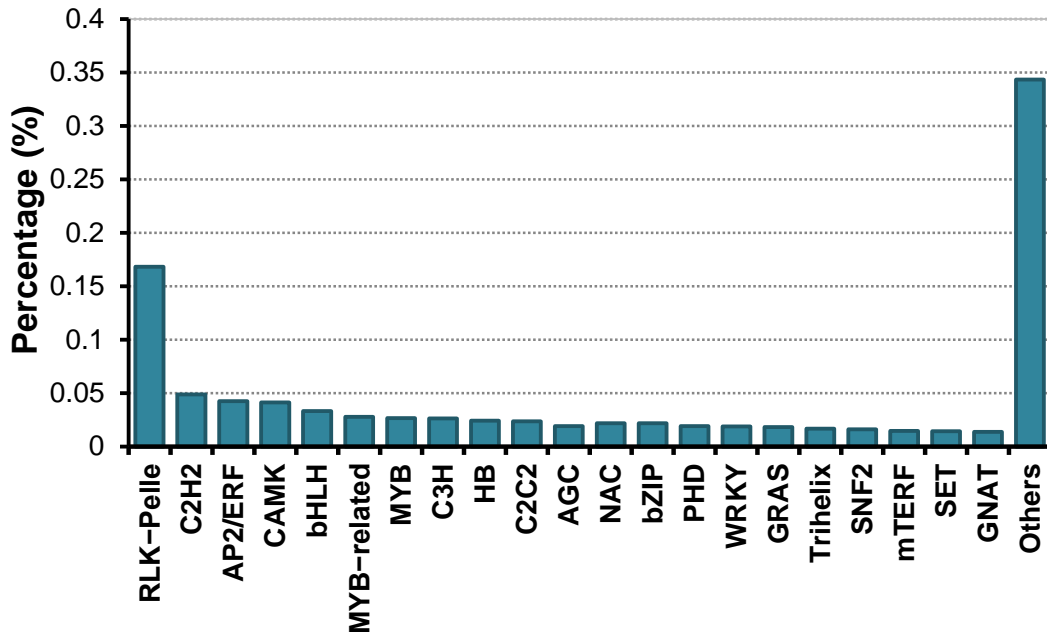

**Supplementary Figure 4.** Percentage of different families of transcription factors that identified in the assembly transcriptome of *P. macrophyllus*.

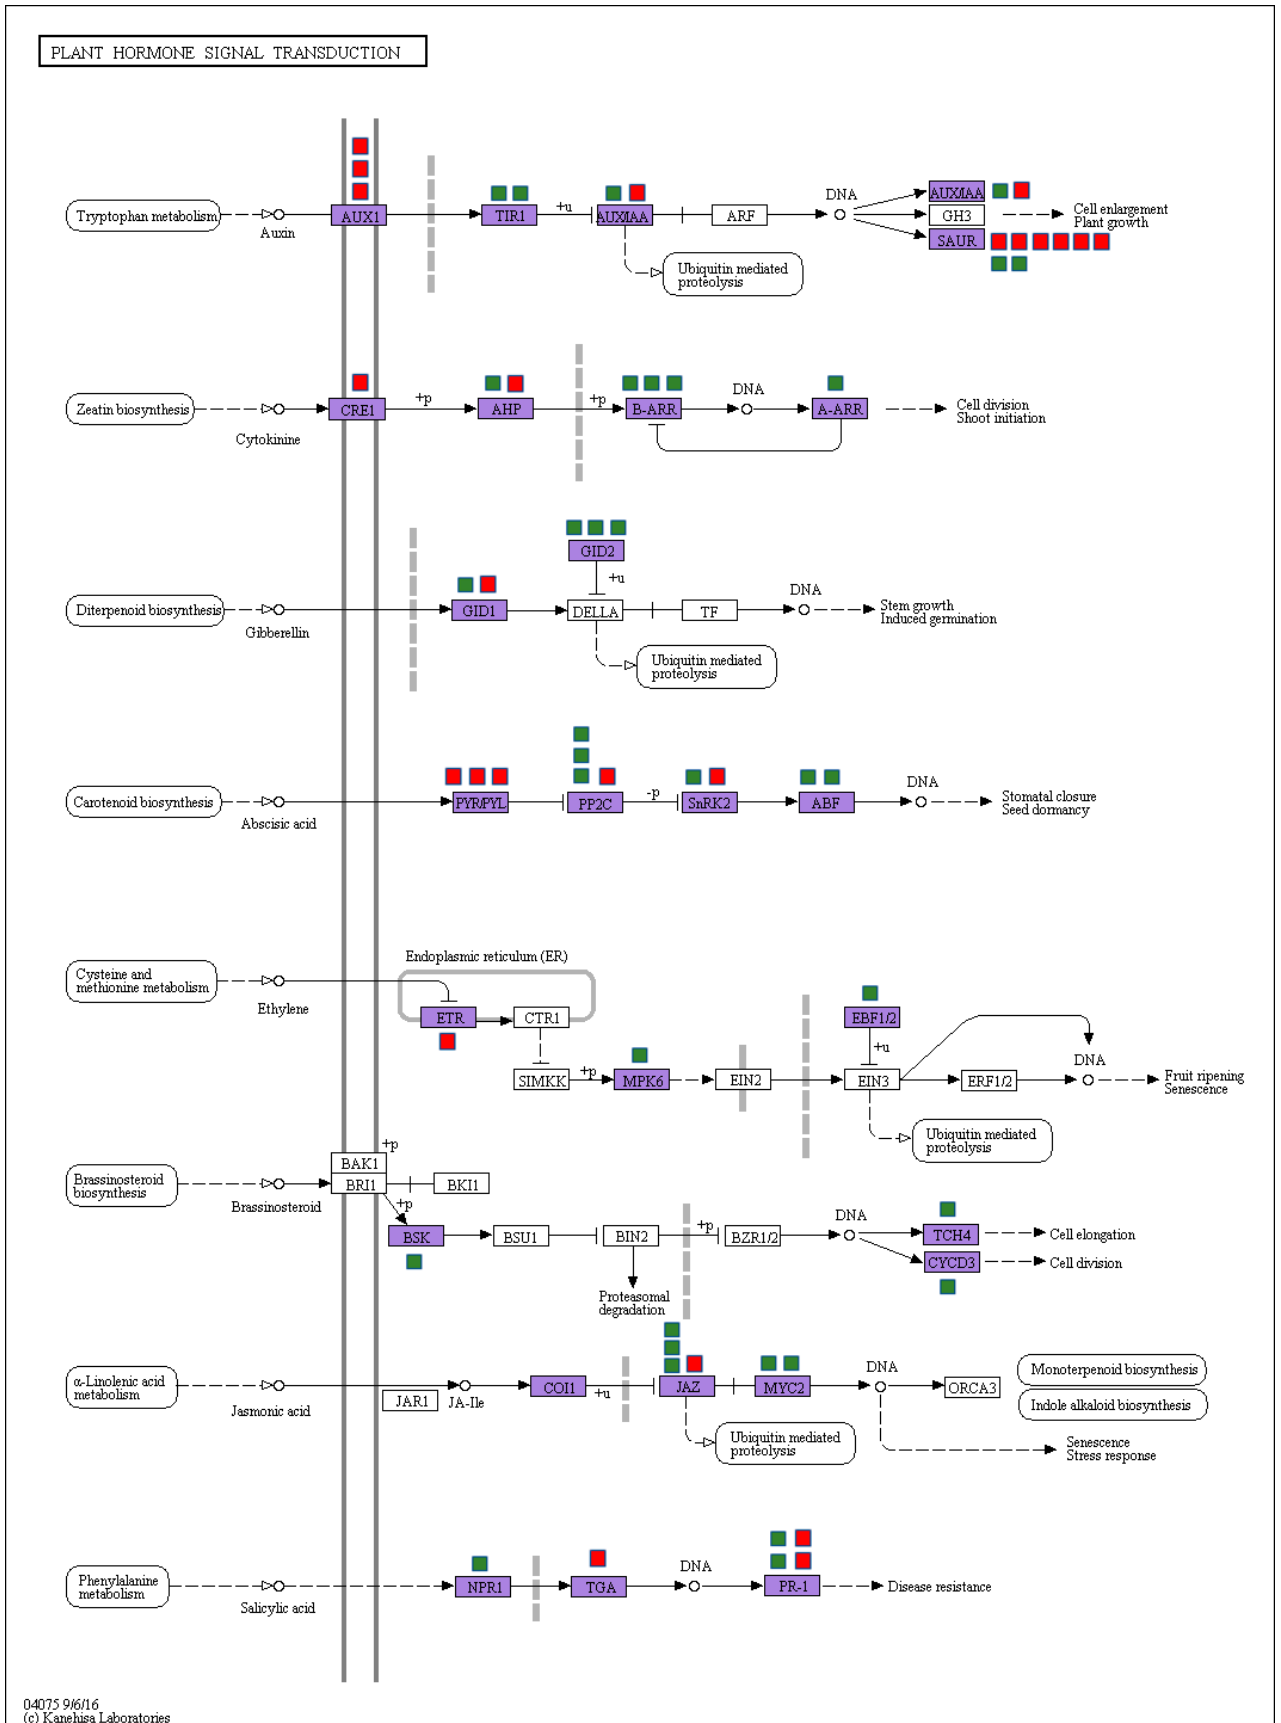

**Supplementary Figure 5.** The genes involved in phytohormones transport or synthesis in the DEGs of *P. macrophyllus* under salt stress.

**Supplementary Table 1.** Information of RNA-seq data of *P. macrophyllus*.

| <b>Samples</b> | <b>Replicate</b> | <b>Clean Reads</b> | <b>Base Number</b> | <b>Mapped reads</b> | <b>Mapped Ratio</b> | <b>GC Content</b> | <b>% <math>\geq</math> Q30</b> |
|----------------|------------------|--------------------|--------------------|---------------------|---------------------|-------------------|--------------------------------|
| Control        | 1                | 22,977,316         | 6,883,571,484      | 19,466,660          | 84.72%              | 45.68%            | 94.56%                         |
| Control        | 2                | 23,184,133         | 6,940,680,172      | 19,736,403          | 85.13%              | 45.36%            | 94.48%                         |
| Control        | 3                | 25,143,716         | 7,536,426,190      | 21,795,599          | 86.68%              | 45.50%            | 94.49%                         |
| Salt-3h        | 1                | 25,018,533         | 7,490,966,990      | 21,334,701          | 85.28%              | 45.35%            | 94.27%                         |
| Salt-3h        | 2                | 22,717,951         | 6,804,419,372      | 19,333,906          | 85.10%              | 45.55%            | 94.86%                         |
| Salt-3h        | 3                | 24,819,231         | 7,429,970,482      | 21,250,331          | 85.62%              | 45.54%            | 95.02%                         |
| Salt-14d       | 1                | 23,264,042         | 6,968,409,636      | 19,269,476          | 82.83%              | 45.80%            | 94.42%                         |
| Salt-14d       | 2                | 25,203,205         | 7,544,301,178      | 20,621,413          | 81.82%              | 46.00%            | 94.49%                         |
| Salt-14d       | 3                | 25,253,988         | 7,566,205,914      | 20,523,535          | 81.27%              | 45.91%            | 94.40%                         |

**Supplementary Table 2.** Primers used for qRT-PCR in *P. macrophyllus*.

| <b>Primers name</b>           | <b>Sequences (5'-3')</b> |
|-------------------------------|--------------------------|
| <i>P.m</i> c100166.graph_c0-F | ATCTCGGTCGGGATAGGA       |
| <i>P.m</i> c100166.graph_c0-R | TATTCAAAGACGAAGGTGGT     |
| <i>P.m</i> c95114.graph_c0-F  | GTATGGCAGTATGATCGTGTT    |
| <i>P.m</i> c95114.graph_c0-R  | GAGCGAATTGCTTGGTCT       |
| <i>P.m</i> c100748.graph_c0-F | AGCCAAAGAAGCCCAAGA       |
| <i>P.m</i> c100748.graph_c0-R | CAAATCAAACGCAAACCTC      |
| <i>P.m</i> c101201.graph_c0-F | CCCCAACACTAACAGGATG      |
| <i>P.m</i> c101201.graph_c0-R | CGGTGACAGTACCCAAGC       |
| <i>P.m</i> c101684.graph_c0-F | TGCGTGTTGGATTGTAGC       |
| <i>P.m</i> c101684.graph_c0-R | AATGGCAAACCTCGTTATGG     |
| <i>P.m</i> c101975.graph_c0-F | GGGTAAGAGTATTAAGCCACA    |
| <i>P.m</i> c101975.graph_c0-R | AATAAAGATTGCTGGAAACAG    |
| <i>P.m</i> c103379.graph_c0-F | CGCCTACACCATAACTTAG      |
| <i>P.m</i> c103379.graph_c0-R | AGCAGCCTCACTCCTCTG       |
| <i>P.m</i> c48941.graph_c0-F  | TCGGGAAGGGCAACCA         |
| <i>P.m</i> c48941.graph_c0-R  | CACCGCCACGACGATAT        |
| <i>P.m</i> c78457.graph_c0-F  | GTTGAAATTCATGGGCAATA     |
| <i>P.m</i> c78457.graph_c0-R  | TCCTCCTCCCTTACCACC       |
| <i>P.m</i> c92856.graph_c0-F  | AGAGGCACGAATGAAAGTC      |
| <i>P.m</i> c92856.graph_c0-R  | ATAAGCGTCAGTAACAAACATG   |
| <i>P.m</i> c100404.graph_c1-F | AAATAGTTTCCCTCCTTGATTT   |
| <i>P.m</i> c100404.graph_c1-R | GTGAATTGCCGTCCCTCT       |
| <i>P.m</i> c101502.graph_c1-F | ACGCTCATCCACCTTACAAC     |
| <i>P.m</i> c101502.graph_c1-R | GAGCTCTGATCCTTCTCCC      |
| Actin-F                       | TTGCTCCAGAAGAACATC       |
| Actin-R                       | ATGGCAACATACATAGCAGG     |
